## RESEARCH ARTICLE

# Assessing the utility of a novel cortical marker of delay discounting (C-DD) in two independent samples of early adolescents: Links with externalizing pathology

Nadia Bounoua<sup>1\*</sup>, Leah D. Church<sup>2</sup>, Melanie A. Matyi<sup>2</sup>, Jeremy Rudoler<sup>2</sup>,  
Kaleigh Wieand<sup>2</sup>, Jeffrey M. Spielberg<sup>2</sup>

**1** Department of Psychology, University of Maryland, College Park, Maryland, United States of America,  
**2** Department of Psychological & Brain Sciences, University of Delaware, Newark, Delaware, United States of America

\* [nbounoua@umd.edu](mailto:nbounoua@umd.edu)

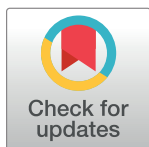

## OPEN ACCESS

**Citation:** Bounoua N, Church LD, Matyi MA, Rudoler J, Wieand K, Spielberg JM (2023) Assessing the utility of a novel cortical marker of delay discounting (C-DD) in two independent samples of early adolescents: Links with externalizing pathology. *PLoS ONE* 18(9): e0291868. <https://doi.org/10.1371/journal.pone.0291868>

**Editor:** Yukiori Goto, Kyoto University Graduate School of Informatics: Kyoto Daigaku Daigakuin Johogaku Kenkyuka, JAPAN

**Received:** March 17, 2023

**Accepted:** September 6, 2023

**Published:** September 27, 2023

**Copyright:** © 2023 Bounoua et al. This is an open access article distributed under the terms of the [Creative Commons Attribution License](https://creativecommons.org/licenses/by/4.0/), which permits unrestricted use, distribution, and reproduction in any medium, provided the original author and source are credited.

**Data Availability Statement:** A portion of the data used in the preparation of this paper (Study 1) were obtained from the Adolescent Brain Cognitive Development (ABCD) Study (<https://abcdstudy.org>), held in the NIMH Data Archive (NDA). Due to third party data use agreement restrictions the authors are not able to make data available. However, data can be accessed with approval of the ABCD consortium (<https://nda.nih.gov/abcd/>)

## Abstract

Delay discounting is a well-established risk factor for risky behaviors and the development of externalizing spectrum disorders. Building upon recent work that developed a novel cortical marker of delay discounting (C-DD) in adult samples, the objective of this study was to test whether the C-DD relates to delay discounting and subsequently externalizing pathology in adolescent samples. The current study used two samples: 9992 early adolescents participating in the ABCD study ( $M_{\text{age}} = 9.93$  years old, 48.7% female), and 56 early adolescents recruited from the community ( $M_{\text{age}} = 12.27$  years old, 55.4% female). Cortical thickness was estimated using the FreeSurfer standard pipeline, and the cortical marker of delay discounting (C-DD) was calculated based on procedures outlined by the initial validation study. All data are cross-sectional in nature. As expected, C-DD was positively related to delay discounting in the ABCD sample, even after accounting for age, biological sex, collection site and data quality indicators. Moreover, results showed that C-DD was discriminately associated with externalizing, but not internalizing, symptoms in both samples of young adolescents. Findings replicate those found in adult samples, suggestive that C-DD may be a useful neuroanatomical marker of youth delay discounting. Replication of findings in other samples will be needed to determine whether C-DD has translational relevance to understanding externalizing psychopathology in adolescent samples.

## Introduction

Adolescence has been well-established as a sensitive period marked by increased engagement in risk-taking behaviors [1, 2]. Despite this recognition, the mechanisms driving this increase in risk-taking remain largely unknown, rendering existing prevention efforts largely ineffective [3]. This is particularly lamentable given that engagement in risky behaviors continues to be the leading cause of preventable injuries and deaths among children and adolescents in the United States [4]. Thus, more research is critically needed to identify risk factors that can be

[requestaccess](#)). The data used in the current study do not require any special permissions, and are available to all authorized users of ABCD study data. All other relevant data for Study 2 are within the paper and its [Supporting information](#) files.

**Funding:** This research was supported by grants from the National Institute of Mental Health [1F31MH120936 awarded to NB], the National Science Foundation [2021317035 awarded to LDC], and the National Institute of General Medical Sciences [P20GM103653 awarded to JMS]. A portion of the data used in the preparation of this article were obtained from the Adolescent Brain Cognitive Development SM (ABCD) Study (<https://abcdstudy.org>), held in the NIMH Data Archive (NDA). This is a multisite, longitudinal study designed to recruit more than 10,000 children aged 9–10 and follow them over 10 years into early adulthood. The ABCD Study® is supported by the National Institutes of Health and additional federal partners under award numbers U01DA041048, U01DA050989, U01DA051016, U01DA041022, U01DA051018, U01DA051037, U01DA050987, U01DA041174, U01DA041106, U01DA041117, U01DA041028, U01DA041134, U01DA050988, U01DA051039, U01DA041156, U01DA041025, U01DA041120, U01DA051038, U01DA041148, U01DA041093, U01DA041089, U24DA041123, U24DA041147. A full list of supporters is available at <https://abcdstudy.org/federal-partners.html>. A listing of participating sites and a complete listing of the study investigators can be found at [https://abcdstudy.org/consortium\\_members/](https://abcdstudy.org/consortium_members/). ABCD consortium investigators designed and implemented the study and/or provided data but did not necessarily participate in the analysis or writing of this report. This manuscript reflects the views of the authors and may not reflect the opinions or views of the NIH or ABCD consortium investigators. The funders had no role in study design, data collection and analysis, decision to publish, or preparation of the manuscript.

**Competing interests:** The authors have declared that no competing interests exist.

used to understand risky behaviors and associated mental health problems early in adolescence. In particular, there has been a push for incorporating a neuroscience approach to understanding adolescent risk-taking [3, 5], and this is one of the fundamental objectives of the ABCD Consortium [6].

Accumulating evidence suggests that delay discounting, or the extent to which individuals tend to prefer smaller, sooner rewards over a larger, later rewards, is a robust behavioral predictor of a myriad of risky behaviors. The majority of existing work on delay discounting has centered on its associations with externalizing psychopathologies, given that these disorders are characterized by poor self-regulation, alterations in reward-related processes, and impulsive decision-making [7, 8]. For example, extant research to date has linked delay discounting to addiction and substance-use behaviors [9–15]. Indeed, meta-analytic work shows that delay discounting is associated with addiction [16], and research with adolescent samples have consistently demonstrated higher delay discounting rates among substance-using adolescents [17–19]. Other studies have extended these findings by demonstrating links between delay discounting and symptoms across the externalizing spectrum disorders, including aggression, rule-breaking, and risky sexual behaviors [20–23].

Given its relevance to risky behavior, research has sought to examine the neurobiological underpinnings of delay discounting. Previous work suggests that delay discounting is associated with various neural structures implicated in reward valuation (e.g., ventromedial PFC), cognitive control (e.g., lateral PFC), and prospection and future planning (e.g., middle temporal lobe; medial PFC) [6, 24–30]. Furthermore, neuroimaging studies consistently link steeper delay discounting (greater preference for immediate rewards) to less structural integrity across the cortex (i.e., thinner cortex and/or smaller volume) [31–33]. Given accumulating evidence that the valuation of future rewards is instantiated in multiple cortical sites, research attempting to index the neural variation linked to delay discounting must incorporate a multivariate approach.

Sadeh and colleagues [34] developed a novel cortical assay of delay discounting (C-DD) in adults that fits the criteria described above. Specifically, the C-DD marker was established by individually regressing the average thickness of each cortical parcellation in both hemispheres (derived from the FreeSurfer Destrieux Atlas) [35] on performance on a well-validated delay discounting task in a sample of over 1,000 adults participating in the Human Connectome Project [36]. The decision to restrict their analyses to cortical thickness, as opposed to other morphometric measures (e.g., subcortical volume), was based on (i) research demonstrating that total cortical (but not total subcortical) gray matter volume was inversely related to delay discounting [32] and (ii) cortical thickness is a reliable and stable neurobiological marker that can be readily assessed using routinely-collected T1 anatomical scans [37, 38]. To compute an individual's C-DD score, each of the resultant 148 standardized beta (regression) weights were multiplied by the thickness of the relevant parcellation and the results summed to create a total C-DD score for that individual, with higher C-DD scores indicating thinner cortex, given that the majority of regression weights were negative. In two independent samples of adults, the association between C-DD and delay discounting was replicated. Furthermore, C-DD was associated with known correlates of delay discounting, including cannabis use and externalizing pathology. Importantly, these relationships with C-DD remained significant even with a behavioral measure of delay discounting included in the model, indicating that this cortical assay captures relevant variance beyond the behavioral task upon which it was based. Based on these preliminary data, the authors conclude that C-DD may represent a neurobiological marker of impulsive choice and externalizing pathology in adult samples [34].

## Current study

Given associations between delay discounting and later behavioral outcomes, a neurobiological marker like the C-DD that assays the tendency to engage in impulsive decision-making has the potential to be an indicator of adolescent's vulnerability for engagement in risky behavior and related pathology. However, given that adolescence is a period of rapid neurodevelopmental changes, particularly in regions associated with cognitive control, reward valuation and emotional process [2, 25], it is unclear whether the adult-derived C-DD would be an effective indicator in this period. Thus, the objective of the present study was to test associations between the C-DD marker and externalizing spectrum psychopathology in two independent samples of early adolescents: (i) a large sample of adolescents from the Adolescent Brain Cognitive Development<sup>SM</sup> (ABCD) Study and (ii) a smaller sample of adolescents recruited from the community. Specifically, we used the betas derived in the original adult C-DD study to create a C-DD score for each participant (using the method described above) in both adolescent samples (see [S1 Appendix](#) for C-DD weights and further details on calculation). We opted to use this approach rather than deriving regression weights specific to the adolescent sample, because our focal objective in this study was to test whether the adult-derived C-DD marker was also a useful indicator of similar psychological processes in adolescent samples. Thus, we were able to test the C-DD's performance in two adolescent samples that were independent of the (adult) sample from which the regression weights were derived. One potential limitation of this approach is that there may be neural relations unique to adolescent delay discounting that are not captured in the adult-derived C-DD marker. Of course, it is possible to employ the same validation method used in the original C-DD paper in the adolescent sample to identify potential adolescent-specific regions/weights related to delay discounting. However, given vast changes in neurodevelopment during early adolescence, one limitation of an adolescent-derived C-DD marker would be that its utility may be limited to adolescence, or even early adolescence, in particular. Instead, the adult C-DD marker could capture variance that transcends a particular developmental period, and it was the purpose of this study to assess whether this was true. Given these considerations, we opted to test the utility of the adult-derived C-DD marker in adolescent samples to test its utility in adolescent samples and maximize compatibility across studies.

## Materials and methods

### Participants

Sample demographics for both studies can be found in [Table 1](#).

**Study 1.** We examined data from 9,992 early adolescents whose FreeSurfer cortical parcelations passed the ABCD<sup>SM</sup> quality assurance checks (<https://abcdstudy.org/scientists/data-sharing/>). ABCD<sup>SM</sup> is a large longitudinal study that recruited children across 21 research sites in the United States. More details of study design and MRI preprocessing can be found at the ABCD website (<https://abcdstudy.org/scientists/protocols/>) and is described elsewhere [39, 40]. Informed consent was provided prior to data collection. At the time of assessment, youth ranged from 8.91–11.08 years old ( $M/SD_{age} = 9.93/0.63$ ), with approximately half of the sample (48.7%) reporting female biological sex.

**Study 2.** A community sample of 56 early adolescents between the ages 11–14 years old ( $M/SD_{age} = 12.27/0.94$ ; 55.4% female) were recruited as part of a larger study examining the neural development related to emotion regulation and psychopathology between 2019 and 2021. Adolescents and their families were eligible to participate in the study if they were between the ages of 11–14 and fluent in English. Adolescents did not have to meet a clinical

Table 1. Sample demographics.

|                                  | Sample 1 n (%)   |                  | Sample 2 n (%) |  |
|----------------------------------|------------------|------------------|----------------|--|
|                                  | 9.93 (0.63)      |                  | 12.27 (0.94)   |  |
| Age (in years); M/SD             |                  |                  |                |  |
| Sex                              |                  |                  |                |  |
| Male                             | 4870 (51.3)      |                  | 25 (44.6)      |  |
| Female                           | 5122 (48.7)      |                  | 31 (55.4)      |  |
| Race                             |                  |                  |                |  |
| Black/African American           | 1618 (16.2)      |                  | 11 (19.6)      |  |
| White                            | 7409 (74.1)      |                  | 37 (66.1)      |  |
| Asian                            | 466 (4.6)        |                  | 4 (7.4)        |  |
| American Indian/Native Alaskan   | 223 (2.2)        |                  | 1 (1.8)        |  |
| Native Hawaiian/Pacific Islander | 47 (0.5)         |                  | 0 (0)          |  |
| Ethnicity                        |                  |                  |                |  |
| Hispanic                         | 1726 (17.3)      |                  | 4 (7.1)        |  |
| Non-Hispanic                     | 8205 (82.1)      |                  | 43 (76.8)      |  |
| Family Income (past 12 months)   |                  |                  |                |  |
| < \$5,000                        | 1656 (16.6)      |                  | 2 (3.6)        |  |
| \$ 5,000- \$9,999                | 829 (8.3)        |                  | 0 (0)          |  |
| \$10,000-\$15,999                | 517 (5.2)        |                  | 0 (0)          |  |
| \$16,000-\$24,999                | 797 (8.0)        |                  | 2 (3.6)        |  |
| \$25,000-\$34,999                | 960 (9.6)        |                  | 4 (7.1)        |  |
| \$35,000-\$49,999                | 1182 (11.8)      |                  | 4 (7.1)        |  |
| \$50,000-\$74,999                | 1446 (14.5)      |                  | 11 (19.6)      |  |
| \$75,000-\$99,999                | 800 (8.0)        |                  | 7 (12.5)       |  |
| > \$100,000                      | 902 (9.0)        |                  | 14 (25)        |  |
| Psychopathology                  | Mean/SD (Range)  | Mean/SD (Range)  |                |  |
| Externalizing Symptoms           | 4.38/5.80 (0–49) | 6.98/5.51 (0–20) |                |  |
| Internalizing Symptoms           | 5.03/5.54 (0–51) | 8.09/7.00 (0–31) |                |  |

<https://doi.org/10.1371/journal.pone.0291868.t001>

diagnosis to be included in the study. Exclusion criteria included: current youth or parental psychosis, history of head injury with loss of consciousness for over 30 minutes or lasting effects, serious medical or neurological condition, current pregnancy, or MRI contraindications. All participants who had complete MRI data were included. Research staff had access to information that could identify individual participants during or after data collection. The University of Delaware, Institutional Review Board approved this research (1464167). Written consent and assent were obtained prior to data collection procedures.

## Materials

An overview of the study variables and their measurement are described below and can be found in [Table 2](#).

**Cortical thickness. Studies 1 & 2.** Thickness of the cortical mantle was estimated using FreeSurfer's (v6) standard morphometric pipeline [41–43]. Information regarding the MRI preprocessing pipeline of the ABCD dataset (Sample 1) can be found on the ABCD website (<https://abcdstudy.org/scientists/protocols/>) and is described elsewhere [6, 39, 44, 45]. For Sample 2, T1 and T2 images were visually inspected and at least two trained raters examined the data for errors, including the inclusion of dura or skull after brain extraction or errors in

**Table 2. Overview of measurement across samples.**

|                                   | Sample 1 | Sample 2 |
|-----------------------------------|----------|----------|
| Cortical Delay Discounting Marker | X        | X        |
| Delay Discounting                 | X        |          |
| CBCL–Externalizing                |          |          |
| CBCL–Internalizing                | X        | X        |

Note. CBCL = Child Behavior Checklist [50]

<https://doi.org/10.1371/journal.pone.0291868.t002>

the pial or white matter surfaces. Cortical thickness was calculated for each parcellation derived from the FreeSurfer Destrieux Atlas, which parcellates the cortex into 74 neuroanatomically-distinct structures in each hemisphere [35, 46].

**Cortical Delay Discounting (C-DD) marker (Studies 1 & 2).** We calculated a cortical delay discounting (C-DD) using the same standardized weights reported in Sadeh et al. [34]. Specifically, we computed a total C-DD score by weighting the z-scored cortical thickness for of the 148 FreeSurfer Destrieux Atlas parcellations [35] by its corresponding standardized beta coefficient derived from Sadeh et al. [34] and summing the resulting values (see S1 Appendix). This procedure was used in both adolescent samples in the present study. The motivation to use the adult-derived betas (as opposed to obtaining adolescent-derived betas) was to maximize compatibility across studies and test whether the C-DD obtained using an adult sample has utility in adolescent samples.

**Delay discounting (Study 1 only).** Delay discounting was measured using the 5-trial adjusting delay discounting task [47]. Full details about this publicly-available task can be found at <https://www.millisecond.com>. Briefly, participants were asked to make a choice between a delayed (\$100) and immediate amount, which is adjusted based on participant's choice on the previous trial. Seven delays ("6 hours", "1 day", "1 week", "1 month", "3 months", "1 year", "5 years") were tested to determine seven indifference points. The "indifference point" is the point where a small- immediate reward is equal in value to a delayed but larger reward. These indifference points typically form a hyperbolic curve [48] whose steepness is defined by a discounting constant  $k$  [12], which was estimated by Mazur's hyperbolic equation [49]. The estimated  $k$ -values were natural log-transformed to account for non-normality of discount rates, with larger  $\ln k$  values indicating a greater degree of discounting future rewards.

**Psychopathology (Studies 1 & 2).** The 112 item Child Behavior Checklist for 6-18-year-old children—Parent Version (CBCL/6-18) [50] was used to assess child psychopathology. The CBCL is a well-validated and widely-used measure of child psychopathology [51–53]. Parents were asked to indicate the response option that best described their child on a scale from 0 ("not true"), 1 ("somewhat/sometimes true") or 2 ("very true") and responses were elicited from one parent per child. Consistent with the CBCL scoring instructions, an externalizing composite score was created by summing the 35 items from the rule-breaking (e.g., "Drinks alcohol without parents' approval.") and aggressive behavior (e.g., "Gets in many fights.") subscales. An internalizing composite score was composed by summing the 31 items from the anxious/depressed (e.g., "Nervous, high-strung, or tense"), withdrawn/depressed (e.g., "Unhappy, sad, or depressed"), and somatic complaints (e.g., "Has stomach aches without a known medical cause.") subscales. Although previous research has shown that the CBCL shows strong diagnostic accuracy [53–55], this measure is not a diagnostic tool. In line with this dimensional approach, higher composite scores indicate greater symptom severity.



## Data analysis

First, we conducted preliminary analyses to examine bivariate associations between C-DD and criterion variables of interest (e.g., delay discounting, impulsivity, psychopathology symptoms). Next, we conducted a partial correlation to test whether C-DD was associated with behavioral delay discounting, after accounting for age, biological sex, and Freesurfer quality control motion parameters in Sample 1. Finally, Generalized Linear Modeling was used to test whether C-DD was associated with youth psychopathology in both samples. This analytics approach was chosen to accommodate the non-normal distributions of key study variables (see S1 and S2 Figs). Specifically, we specified a gamma distribution with log link model, with bootstrapping (1000 samples) and 95% confidence intervals. Age and biological sex were included as covariates of no interest in all multivariate analyses. All analyses were conducted in SPSS v.28.0 [56]. It should be noted that all external correlates of C-DD were measured at the same time point, and thus our findings reflect concurrent associations. A portion of these data used in the preparation of this article (Study 1) were obtained from the Adolescent Brain Cognitive DevelopmentSM (ABCD) Study (<https://abcdstudy.org>), held in the NIMH Data Archive (NDA). All relevant data for Study 2 are within the manuscript and its Supporting Information files.

## Results and discussion

### Sample 1

Preliminary analyses revealed that C-DD scores were positively associated with age ( $r = .12, p < .001$ ), such that older youth had higher C-DD scores than younger adolescents. Significant sex differences emerged in relation to C-DD scores ( $F_{(1,9990)} = 11.74, p < .001$ ), such that boys ( $M/SD = -.186/1.77$ ) had larger C-DD scores than girls ( $M = -.185/1.78$ ). Internalizing and externalizing symptoms were moderately correlated ( $r = 0.59, p < 0.001$ ).

**Delay discounting.** As expected, C-DD was positively correlated with  $\ln k$ -values at a bivariate level ( $r = .04, p < .001$ ), indicating that higher values on this cortical assay correspond to greater impulsive choice. Importantly, this relationship remained significant when controlling for age, biological sex, MRI quality control measures, and data collection site ( $\beta = .04, p < .001$ ).

**Psychopathology.** Consistent with past work, C-DD was associated with externalizing symptoms at a bivariate level ( $r = .02, p = .02$ ), such that greater C-DD scores were associated with more externalizing symptoms. To test the incremental validity of C-DD over behavioral measures of impulsivity, We then conducted a generalized linear model to test whether C-DD continued to be associated with externalizing symptoms, after controlling for behavioral delay discounting ( $\ln K$ ), age, sex, and (see Table 3). Consistent with past work, C-DD remained a significant predictor of externalizing pathology above and beyond behavioral delay discounting ( $\ln k$ -values).

As expected, C-DD scores were not associated with internalizing symptoms, after accounting for age, sex, and  $\ln K$  [ $B(SE) = -.0002(.001), p = .80$ ], suggesting that C-DD is discriminately associated with externalizing spectrum pathology.

### Sample 2

C-DD was not associated with age ( $r = 0.11, p = 0.41$ ) or biological sex ( $F_{(1,54)} = 0.18, p = 0.67$ ) in this sample, likely due to the smaller sample size. Internalizing and externalizing symptoms were moderately correlated ( $r = 0.58, p < 0.001$ ). Delay discounting behavior was not assessed in this sample, and thus relationships with  $\ln k$  could not be examined.

**Table 3. C-DD is incrementally associated with externalizing pathology among early adolescents, above and beyond behavioral delay discounting (Sample 1).**

|                | B     | SE    | <i>p</i> | 95% CI        |
|----------------|-------|-------|----------|---------------|
| Biological sex | -.031 | .003  | < .001   | -.037, -.025  |
| Age            | -.001 | .0002 | .007     | -.001, -.0001 |
| ln- <i>K</i>   | .001  | .001  | .062     | -.00001, .002 |
| C-DD           | .002  | .001  | .043     | .00005, .004  |

*Note.* Results from Generalized Linear model with gamma distribution and log link. Bootstrapping with 1,000 samples and 95% confidence intervals (CI). Biological sex is coded as 1 (male), 2 (female). ln-*K* = natural log-transformed *k*-value (behavioral delay discounting). C-DD = cortical delay discounting marker. Pearson chi-square = 193.95<sub>(9290)</sub>, *p* = .021.

<https://doi.org/10.1371/journal.pone.0291868.t003>

**Psychopathology.** Consistent with past work and the findings in the ABCD sample, C-DD was positively associated with externalizing symptoms ( $r = 0.32$ ,  $p = 0.016$ ), indicating that greater C-DD scores were associated with more rule-breaking and aggressive behaviors (see Fig 1). Results of a hierarchical linear regression revealed that the positive association between C-DD and externalizing symptoms remained significant after including age and biological sex in the model (see Table 4). As expected, C-DD scores were not associated with internalizing symptoms, after accounting for age and biological sex [(B(SE) = .017(.013),  $p = .163$ )], suggesting that C-DD is discriminately associated with externalizing spectrum pathology.

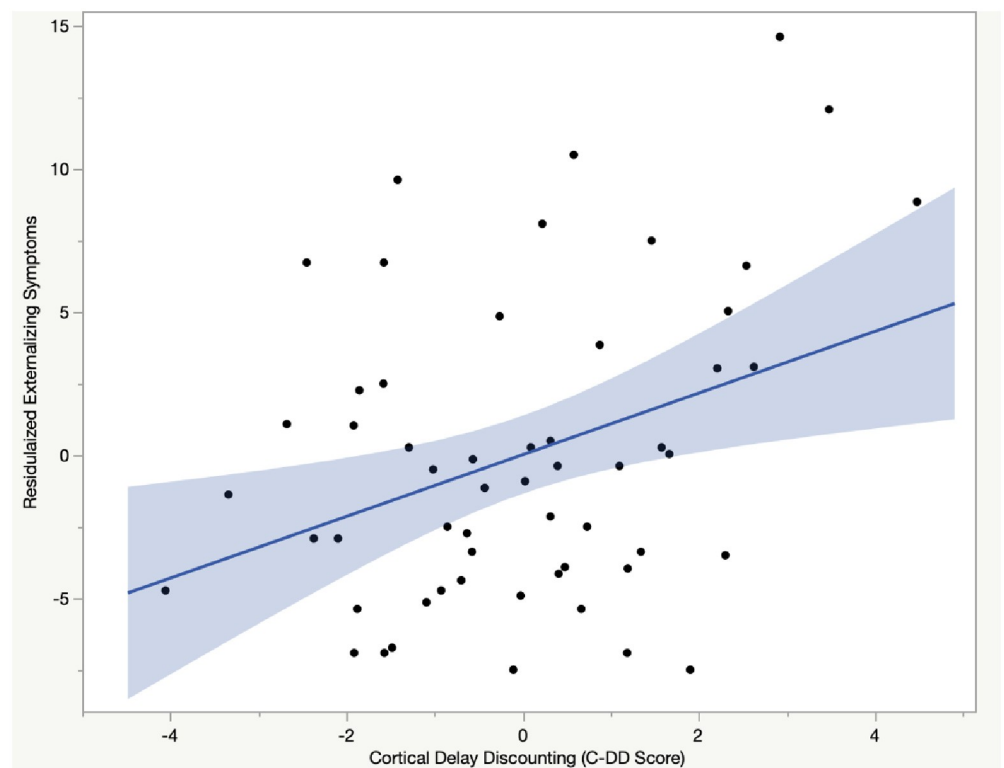**Fig 1. C-DD is positively associated with externalizing symptoms in Sample 2 (after accounting for covariates).**

<https://doi.org/10.1371/journal.pone.0291868.g001>

**Table 4. C-DD is associated with externalizing pathology among early adolescents (Sample 2).**

|                | <b>B</b> | <b>SE</b> | <b>p</b> | <b>95% CI</b> |
|----------------|----------|-----------|----------|---------------|
| Biological sex | -.068    | .033      | .040     | -.141, .014   |
| Age            | -.026    | .018      | .150     | -.065, .014   |
| C-DD           | .013     | .003      | .003     | .006, .044    |

*Note.* Results from Generalized Linear model with gamma distribution and log link. Bootstrapping with 1,000 samples and 95% confidence intervals (CI). Biological sex is coded as 1 (male), 2 (female). C-DD = cortical delay discounting marker. Pearson chi-square = 0.770<sub>(52)</sub>,  $p = .015$ .

<https://doi.org/10.1371/journal.pone.0291868.t004>

## Conclusions

The objective of the present study was to investigate the utility of a novel whole-cortex marker of delay discounting for understanding impulsive decision making and externalizing pathology among early adolescents. Consistent with findings from the initial validation study in adults [34], we found that the cortical delay discounting marker (C-DD) was associated with delay discounting rates in the ABCD dataset. Moreover, C-DD was associated with greater externalizing, but not internalizing, psychopathology. Importantly, C-DD showed incremental predictive validity above and beyond behavioral delay discounting measures. Evidence of cross-validation was also identified, such that C-DD was associated with externalizing, but not internalizing symptoms in a smaller community sample of early adolescents. Taken together, findings of the current study provide initial support for the utility of using the C-DD as a potential neuroanatomical assay of adolescent impulsive decision-making that may have translational relevance to externalizing pathology and risk-taking in this sensitive population.

## Utility of a cortical marker of adolescent delay discounting

Adolescence has been consistently characterized as a sensitive period for impulsive decision-making [57, 58], placing adolescents at increased risk for poor outcomes. Thus, it is important to understand correlates of impulsive decision-making during this sensitive period across multiple levels of analysis. A wealth of literature has identified links between delay discounting and a range of pathological behaviors, and neuroimaging research has implicated numerous neural regions across the cortex associated with impulsive decision-making (see review above). A whole-cortex biomarker that indexes individual differences in impulsive decision-making has potential to identify youth who may be at a greater likelihood of engaging in externalizing behaviors. Consistent with findings in adult samples [34], we found that C-DD was significantly associated with a greater tendency to prefer smaller, sooner rewards in a large sample of early adolescents.

It should be noted that the size of this effect would be considered small (*Pearson's*  $r = 0.04$ ) using traditional effect size conventions [59]. New conventions have been proposed for interpreting effect sizes when using large sample sizes, such as the ABCD database [60]. In this framework, the observed effect size would fall within the “average” range and would be considered meaningful given the sample size. Further, the effect size is consistent with effect sizes reported by other studies using the ABCD dataset [61–63]. At the same time, the effect size leaves the true predictive power of the C-DD unclear, and thus future work is needed to determine the potential research and clinical utility of the C-DD.

Nonetheless, our findings provide preliminary support for the validity of C-DD as a cortical assay of delay discounting among early adolescents. Ultimately, the validation of the C-DD for adolescent populations opens avenues for future research interested in examining correlates of



adolescent decision-making. Given that the C-DD can be calculated solely from T1 structural scans, which are collected in all MRI studies and are commonly collected in clinical settings, researchers can derive the C-DD metric in existing adolescent neuroimaging datasets that may not include behavioral measures of delay discounting. Further, current delay discounting paradigms vary in design and may conflate the tendency to engage in impulsive decision-making with individual differences in orientation to the future [5]. Given that C-DD is independent of these specific task parameters, it can be used to facilitate reproducible research on the correlates of adolescent delay discounting across multiple datasets. Accumulating empirical evidence demonstrating correlates of a neural marker of adolescent decision-making has the potential to advance the understanding of normative and disrupted neurodevelopment as it relates to real-world behaviors. To encourage this research, procedures for calculating the C-DD have been included in the [S1 Appendix](#) (see Supplementary Material).

### C-DD and adolescent externalizing pathology

Delay discounting is situated within the NIMH Research Domain Criteria [64], with recent work highlighting delay discounting as a particularly useful marker with transdiagnostic relevance [15]. The second aim of this study was to examine whether C-DD was associated with externalizing pathology. Using two independent samples, we found support for our hypothesis. As expected, findings showed that C-DD was selectively associated with externalizing symptoms, such as rule-breaking and aggressive behaviors, in both samples of adolescents. Evidence of discriminant validity was also observed in that C-DD was not associated with internalizing pathology (e.g., depression, anxiety). Although preliminary, these associations suggest that the C-DD may be used as a marker of impulsive decision-making that has clinical relevance to youth samples in studies that have T1 scans but did not collect behavioral or self-report measures of delay discounting. Furthermore, findings from Study 1 revealed that the C-DD had incremental validity in predicting externalizing pathology in the ABCD sample above and beyond a behavioral measure of delay discounting (lnK), indicating that C-DD explains unique variance in externalizing pathology not accounted for by a behavioral delay discounting paradigm alone. Thus, the C-DD may serve as a useful additional indicator, even in existing datasets that contain behavioral measures of delay discounting. Indeed, despite robust associations between behavioral delay discounting measures and risky behaviors, research shows that these paradigms do not tend to correlate with other self-reports of self-control or impulsivity [5, 65] pointing to the multifaceted nature of reward valuation and decision-making processes. Given the complexity of these processes, a multi-level approach that encompasses self-report, behavioral, and neuroanatomical measures of delay discounting may be necessary to elucidate associations between impulsive decision making and psychopathology. Given the relative stability of cortical thickness measures [66], one exciting potential is that the C-DD, along with other measures, could be used to identify at-risk youth prior to the engagement in risky behaviors.

### Strengths, limitations, & future directions

This study has several notable strengths, including the validation of C-DD using two samples of early adolescents, one of which was extremely large and the examination of convergent and divergent validity of C-DD. However, findings should be interpreted in light of study limitations. First, the samples in this study were predominately white and non-Hispanic/Latinx and recruited from the community. Thus, future research should seek to replicate these findings in other samples with more diverse samples across different settings, such as clinical samples. Second, the use of a multisite data collection study may allow for greater variability in

experimental error [67]. Third, the original creation of C-DD consisted of only cortical thickness; however, research has also linked subcortical regions to impulsivity and decision-making processes [27, 68]. Thus, future research should examine how the interplay between C-DD and structural properties of subcortical regions relates to adolescent delay discounting and other impulsivity-related endophenotypes. Fourth, the current study relied solely on cross-sectional data, limiting our ability to make causal inferences of the associations between C-DD and adolescent externalizing pathology. Important areas for future research will be to assess the stability and predictive validity of the C-DD over the course of adolescence, and its ability to predict future psychopathology using longitudinal data.

Important areas for future research will be to assess the stability and predictive validity of the C-DD over the course of adolescence, and its ability to predict future psychopathology and other impulsive-based outcomes of interest. The C-DD was intentionally created as a whole-cortex marker, based on previous studies demonstrating that the tendency to discount future rewards (i.e., delay discounting) is not limited to specific cortical regions, but instead is associated with neural regions across the cortex [32]. One potential interpretation of these findings is that delay discounting is a complex phenomenon that likely involves several psychological processes that are instantiated in multiple places across the cortex. Future research will be needed to test for the specific mechanisms that link C-DD to endophenotypes like delay discounting and related-psychopathologies in order to further elucidate the driving forces behind the present findings. Moreover, given recent initiatives to apply transdiagnostic approaches to psychopathology [69], future work should also seek to examine the extent to which C-DD relates to dimensions and clusters of adolescent externalizing psychopathology using data-driven methods. This line of work would provide informative clarification on the specificity of C-DD to different dimensions of adolescent psychopathology. Similarly, future studies could test whether C-DD is associated with externalizing psychopathology at a diagnostic level using clinical interviews, as well as the impact of such psychopathology on adolescent functioning. Upon replication of these findings, the C-DD may also be used to inform etiological models of youth externalizing pathology and has the potential to be used in preventative measures by identifying early adolescents at greatest risk for developing impulse-control related pathology.

## Supporting information

**S1 Appendix. Calculation of C-DD originally cited by Sadeh et al (2023).**

(DOCX)

**S1 Dataset.**

(XLSX)

**S1 Fig. Distributions and bivariate associations between key study variables from Study 1.**

*Note.* C-DD = cortical marker of delay discounting; CBCL = Child Behavior Checklist (Achenbach & Rescorla, 2001).

(DOCX)

**S2 Fig. Distributions and bivariate associations between key study variables from Study 2.**

*Note.* C-DD = cortical marker of delay discounting; CBCL = Child Behavior Checklist (Achenbach & Rescorla, 2001).

(DOCX)

## Author Contributions

**Conceptualization:** Nadia Bounoua, Jeffrey M. Spielberg.

**Data curation:** Nadia Bounoua, Melanie A. Matyi, Jeremy Rudoler, Kaleigh Wieand, Jeffrey M. Spielberg.

**Formal analysis:** Nadia Bounoua, Jeffrey M. Spielberg.

**Funding acquisition:** Jeffrey M. Spielberg.

**Methodology:** Jeffrey M. Spielberg.

**Project administration:** Nadia Bounoua, Leah D. Church, Jeffrey M. Spielberg.

**Software:** Jeffrey M. Spielberg.

**Supervision:** Leah D. Church, Jeffrey M. Spielberg.

**Writing – original draft:** Nadia Bounoua, Leah D. Church.

**Writing – review & editing:** Nadia Bounoua, Leah D. Church, Melanie A. Matyi, Jeremy Rudoler, Kaleigh Wieand, Jeffrey M. Spielberg.

## References

1. Eaton D. K., Kann L., Kinchen S., Ross J., Hawkins J., Harris W. A., et al. (2006). Youth risk behavior surveillance—United States, 2005. *Morbidity and Mortality Weekly Report. Surveillance Summaries (Washington, D.C.: 2002)*, 55(5), 1–108. PMID: [16760893](https://pubmed.ncbi.nlm.nih.gov/16760893/)
2. Steinberg L. (2008). A Social Neuroscience Perspective on Adolescent Risk-Taking. *Developmental Review. DR*, 28(1), 78–106. <https://doi.org/10.1016/j.dr.2007.08.002> PMID: [18509515](https://pubmed.ncbi.nlm.nih.gov/18509515/)
3. Steinberg L. (2007). Risk Taking in Adolescence: New Perspectives from Brain and Behavioral Science. *Current Directions in Psychological Science*, 16(2), 55–59. <https://doi.org/10.1111/j.1467-8721.2007.00475.x>
4. Cunningham R. M., Walton M. A., & Carter P. M. (2018). The Major Causes of Death in Children and Adolescents in the United States. *New England Journal of Medicine*, 379(25), 2468–2475. <https://doi.org/10.1056/NEJMs1804754> PMID: [30575483](https://pubmed.ncbi.nlm.nih.gov/30575483/)
5. Steinberg L., Graham S., O'Brien L., Woolard J., Cauffman E., & Banich M. (2009). Age differences in future orientation and delay discounting. *Child Development*, 80(1), 28–44. <https://doi.org/10.1111/j.1467-8624.2008.01244.x> PMID: [19236391](https://pubmed.ncbi.nlm.nih.gov/19236391/)
6. Luciana M., Bjork J. M., Nagel B. J., Barch D. M., Gonzalez R., Nixon S. J., et al. (2018). Adolescent neurocognitive development and impacts of substance use: Overview of the adolescent brain cognitive development (ABCD) baseline neurocognition battery. *Developmental Cognitive Neuroscience*, 32, 67–79. <https://doi.org/10.1016/j.dcn.2018.02.006> PMID: [29525452](https://pubmed.ncbi.nlm.nih.gov/29525452/)
7. Barkley R. A., Edwards G., Laneri M., Fletcher K., & Metevia L. (2001). Executive functioning, temporal discounting, and sense of time in adolescents with attention deficit hyperactivity disorder (ADHD) and oppositional defiant disorder (ODD). *Journal of abnormal child psychology*, 29, 541–556. <https://doi.org/10.1023/a:1012233310098> PMID: [11761287](https://pubmed.ncbi.nlm.nih.gov/11761287/)
8. Rung J. M., & Madden G. J. (2018). Experimental reductions of delay discounting and impulsive choice: A systematic review and meta-analysis. *Journal of Experimental Psychology: General*, 147(9), 1349–1381. <https://doi-org.udel.idm.oclc.org/10.1037/xge0000462> PMID: [30148386](https://pubmed.ncbi.nlm.nih.gov/30148386/)
9. Amlung M., Marsden E., Holshausen K., Morris V., Patel H., Vedelago L., et al. (2019). Delay Discounting as a Transdiagnostic Process in Psychiatric Disorders: A Meta-analysis. *JAMA Psychiatry*, 76(11), 1176–1186. <https://doi.org/10.1001/jamapsychiatry.2019.2102> PMID: [31461131](https://pubmed.ncbi.nlm.nih.gov/31461131/)
10. Bickel W., & Marsch L. A. (2001). Toward a behavioral economic understanding of drug dependence: Delay discounting processes. *Addiction (Abingdon, England)*, 96, 73–86. <https://doi.org/10.1046/j.1360-0443.2001.961736.x> PMID: [11177521](https://pubmed.ncbi.nlm.nih.gov/11177521/)
11. Bickel W. K., Athamneh L. N., Basso J. C., Mellis A. M., DeHart W. B., Craft W. H., et al. (2019). Excessive discounting of delayed reinforcers as a trans-disease process. *Current Opinion in Psychology*, 30, 59–64.
12. Bickel W. K., Jarmolowicz D. P., Mueller E. T., Koffarnus M. N., & Gatchalian K. M. (2012). Excessive discounting of delayed reinforcers as a trans-disease process contributing to addiction and other disease-related vulnerabilities: Emerging evidence. *Pharmacology & Therapeutics*, 134(3), 287–297. <https://doi.org/10.1016/j.pharmthera.2012.02.004> PMID: [22387232](https://pubmed.ncbi.nlm.nih.gov/22387232/)

13. Cosenza M., & Nigro G. (2015). Wagering the future: Cognitive distortions, impulsivity, delay discounting, and time perspective in adolescent gambling. *Journal of Adolescence*, 45, 56–66. <https://doi.org/10.1016/j.adolescence.2015.08.015> PMID: 26363842
14. Green L., & Myerson J. (2004). A Discounting Framework for Choice with Delayed and Probabilistic Rewards. *Psychological Bulletin*, 130, 769–792. <https://doi.org/10.1037/0033-2909.130.5.769> PMID: 15367080
15. Lempert K. M., Steinglass J. E., Pinto A., Kable J. W., & Simpson H. B. (2019). Can delay discounting deliver on the promise of RDoC? *Psychological Medicine*, 49(2), 190–199. <https://doi.org/10.1017/S0033291718001770> PMID: 30070191
16. MacKillop J., Amlung M. T., Few L. R., Ray L. A., Sweet L. H., & Munafò M. R. (2011). Delayed reward discounting and addictive behavior: A meta-analysis. *Psychopharmacology*, 216(3), 305–321. <https://doi.org/10.1007/s00213-011-2229-0> PMID: 21373791
17. Audrain-McGovern J., Rodriguez D., Tercyak K. P., Epstein L. H., Goldman P., & Wileyto E. P. (2004). Applying a behavioral economic framework to understanding adolescent smoking. *Psychology of Addictive Behaviors: Journal of the Society of Psychologists in Addictive Behaviors*, 18(1), 64–73. <https://doi.org/10.1037/0893-164X.18.1.64> PMID: 15008687
18. Field M., Christiansen P., Cole J., & Goudie A. (2007). Delay discounting and the alcohol Stroop in heavy drinking adolescents. *Addiction*, 102(4), 579–586. <https://doi.org/10.1111/j.1360-0443.2007.01743.x> PMID: 17309540
19. Reynolds B., & Fields S. (2012). Delay discounting by adolescents experimenting with cigarette smoking. *Addiction*, 107(2), 417–424. <https://doi.org/10.1111/j.1360-0443.2011.03644.x> PMID: 21906199
20. Bobova L., Finn P. R., Rickert M. E., & Lucas J. (2009). Disinhibitory psychopathology and delay discounting in alcohol dependence: personality and cognitive correlates. *Experimental and clinical psychopharmacology*, 17(1), 51. <https://doi.org/10.1037/a0014503> PMID: 19186934
21. Daugherty J. R., & Brase G. L. (2010). Taking time to be healthy: Predicting health behaviors with delay discounting and time perspective. *Personality and Individual Differences*, 48(2), 202–207.
22. Fields S. A., Ramos A., & Reynolds B. A. (2015). Delay discounting and health risk behaviors: the potential role of stress. *Current Opinion in Psychology*, 5, 101–105.
23. Finn P. R., Gunn R. L., & Gerst K. R. (2015). The effects of a working memory load on delay discounting in those with externalizing psychopathology. *Clinical psychological science*, 3(2), 202–214. <https://doi.org/10.1177/2167702614542279> PMID: 25893146
24. Carter R. M., Meyer J. R., & Huettel S. A. (2010). Functional neuroimaging of intertemporal choice models: A review. *Journal of Neuroscience, Psychology, and Economics*, 3(1), 27. <https://doi.org/10.1037/a0018046>
25. Casey B. J., Jones R. M., & Hare T. A. (2008). The Adolescent Brain. *Annals of the New York Academy of Sciences*, 1124, 111–126. <https://doi.org/10.1196/annals.1440.010> PMID: 18400927
26. Frost R., & McNaughton N. (2017). The neural basis of delay discounting: A review and preliminary model. *Neuroscience & Biobehavioral Reviews*, 79, 48–65. <https://doi.org/10.1016/j.neubiorev.2017.04.022> PMID: 28465167
27. Loganathan K., Lv J., Cropley V., Ho E. T. W., & Zalesky A. (2021). Associations Between Delay Discounting and Connectivity of the Valuation-control System in Healthy Young Adults. *Neuroscience*, 452, 295–310. <https://doi.org/10.1016/j.neuroscience.2020.11.026> PMID: 33242540
28. McClure S. M., Laibson D. I., Loewenstein G., & Cohen J. D. (2004). Separate Neural Systems Value Immediate and Delayed Monetary Rewards. *Science*, 306(5695), 503–507. <https://doi.org/10.1126/science.1100907> PMID: 15486304
29. Peters J., & Büchel C. (2011). The neural mechanisms of inter-temporal decision-making: Understanding variability. *Trends in Cognitive Sciences*, 15(5), 227–239. <https://doi.org/10.1016/j.tics.2011.03.002> PMID: 21497544
30. Stanger C., Elton A., Ryan S. R., James G. A., Budney A. J., & Kilts C. D. (2013). Neuroeconomics and Adolescent Substance Abuse: Individual Differences in Neural Networks and Delay Discounting. *Journal of the American Academy of Child and Adolescent Psychiatry*, 52(7), 747–755.e6. <https://doi.org/10.1016/j.jaac.2013.04.013> PMID: 23800488
31. Bernhardt B. C., Smallwood J., Tusche A., Ruby F. J. M., Engen H. G., Steinbeis N., et al. (2014). Medial prefrontal and anterior cingulate cortical thickness predicts shared individual differences in self-generated thought and temporal discounting. *NeuroImage*, 90, 290–297. <https://doi.org/10.1016/j.neuroimage.2013.12.040> PMID: 24384154
32. Owens M. M., Gray J. C., Amlung M. T., Oshri A., Sweet L. H., & MacKillop J. (2017). Neuroanatomical foundations of delayed reward discounting decision making. *NeuroImage*, 161, 261–270. <https://doi.org/10.1016/j.neuroimage.2017.08.045> PMID: 28843539

33. Pehlivanova M., Wolf D., Sotiras A., Kaczkurkin A., Moore T., Ciric R., et al. (2018). Diminished Cortical Thickness Is Associated with Impulsive Choice in Adolescence. *The Journal of Neuroscience*, 38, 2200–2217. <https://doi.org/10.1523/JNEUROSCI.2200-17.2018> PMID: 29440536
34. Sadeh N., Miglin R., Bounoua N., Sheehan A., & Spielberg J. M. (2023). Development of a cortical delay discounting assay: A potential biomarker of externalizing disorders. *Psychological Medicine*, 1–8. <https://doi.org/10.1017/S003329172100252X> PMID: 34167611
35. Destrieux C., Fischl B., Dale A., & Halgren E. (2010). Automatic parcellation of human cortical gyri and sulci using standard anatomical nomenclature. *NeuroImage*, 53(1), 1–15. <https://doi.org/10.1016/j.neuroimage.2010.06.010> PMID: 20547229
36. Van Essen D. C., Ugurbil K., Auerbach E., Barch D., Behrens T. E., Bucholz R., et al. (2012). The Human Connectome Project: a data acquisition perspective. *NeuroImage*, 62(4), 2222–2231. <https://doi.org/10.1016/j.neuroimage.2012.02.018> PMID: 22366334
37. Han X., Jovicich J., Salat D., van der Kouwe A., Quinn B., Czanner S., et al. (2006). Reliability of MRI-derived measurements of human cerebral cortical thickness: the effects of field strength, scanner upgrade and manufacturer. *NeuroImage*, 32(1), 180–194. <https://doi.org/10.1016/j.neuroimage.2006.02.051> PMID: 16651008
38. Noble S., Spann M. N., Tokoglu F., Shen X., Constable R. T., & Scheinost D. (2017). Influences on the test–retest reliability of functional connectivity MRI and its relationship with behavioral utility. *Cerebral cortex*, 27(11), 5415–5429. <https://doi.org/10.1093/cercor/bhx230> PMID: 28968754
39. Casey B. J., Cannonier T., Conley M. I., Cohen A. O., Barch D. M., Heitzeg M. M., et al. (2018). The Adolescent Brain Cognitive Development (ABCD) study: Imaging acquisition across 21 sites. *Developmental Cognitive Neuroscience*, 32, 43–54. <https://doi.org/10.1016/j.dcn.2018.03.001> PMID: 29567376
40. Hagler D. J. Jr, Hatton S., Cornejo M. D., Makowski C., Fair D. A., Dick A. S., et al. (2019). Image processing and analysis methods for the Adolescent Brain Cognitive Development Study. *NeuroImage*, 202, 116091. <https://doi.org/10.1016/j.neuroimage.2019.116091> PMID: 31415884
41. Fischl B., & Dale A. M. (2000). Measuring the thickness of the human cerebral cortex from magnetic resonance images. *Proceedings of the National Academy of Sciences of the United States of America*, 97(20), 11050–11055. <https://doi.org/10.1073/pnas.200033797> PMID: 10984517
42. Fischl B., Salat D. H., Busa E., Albert M., Dieterich M., Haselgrove C., et al. (2002). Whole brain segmentation: Automated labeling of neuroanatomical structures in the human brain. *Neuron*, 33(3), 341–355. [https://doi.org/10.1016/s0896-6273\(02\)00569-x](https://doi.org/10.1016/s0896-6273(02)00569-x) PMID: 11832223
43. Fischl B., van der Kouwe A., Destrieux C., Halgren E., Ségonne F., Salat D. H., et al. (2004). Automatically parcellating the human cerebral cortex. *Cerebral Cortex (New York, N.Y.: 1991)*, 14(1), 11–22. <https://doi.org/10.1093/cercor/bhg087> PMID: 14654453
44. Barch D. M., Albaugh M. D., Avenevoli S., Chang L., Clark D. B., Glantz M. D., et al. (2018). Demographic, physical, and mental health assessments in the adolescent brain and cognitive development study: Rationale and description. *Developmental Cognitive Neuroscience*, 32, 55–66. <https://doi.org/10.1016/j.dcn.2017.10.010> PMID: 29113758
45. Volkow N. D., Koob G. F., Croyle R. T., Bianchi D. W., Gordon J. A., Koroshetz W. J., et al. (2018). The conception of the ABCD study: From substance use to a broad NIH collaboration. *Developmental Cognitive Neuroscience*, 32, 4–7. <https://doi.org/10.1016/j.dcn.2017.10.002> PMID: 29051027
46. van der Kouwe A. J. W., Benner T., Salat D. H., & Fischl B. (2008). Brain morphometry with multiecho MPRAGE. *NeuroImage*, 40(2), 559–569. <https://doi.org/10.1016/j.neuroimage.2007.12.025> PMID: 18242102
47. Koffarnus M. N., & Bickel W. K. (2014). A 5-trial adjusting delay discounting task: Accurate discount rates in less than one minute. *Experimental and Clinical Psychopharmacology*, 22(3), 222–228. <https://doi.org/10.1037/a0035973> PMID: 24708144
48. Odum A. L. (2011). Delay Discounting: I'm a k, You're a k. *Journal of the Experimental Analysis of Behavior*, 96(3), 427–439. <https://doi.org/10.1901/jeab.2011.96-423> PMID: 22084499
49. Mazur J. E. (1987). An adjusting procedure for studying delayed reinforcement. *Quantitative analyses of behavior*, 5, 55–73.
50. Achenbach T. M., & Rescorla L. A. (2001). *Manual for the ASEBA School-Age Forms & Profiles*. Burlington, VT: University of Vermont, Research Center for Children, Youth, & Families.
51. Jensen P. S., Watanabe H. K., Richters J. E., Roper M., Hibbs E. D., Salzberg A. D., et al. (1996). Scales, diagnoses, and child psychopathology: II. Comparing the CBCL and the DISC against external validators. *Journal of abnormal child psychology*, 24, 151–168. <https://doi.org/10.1007/BF01441482> PMID: 8743242
52. Lowe L. A. (1998). Using the Child Behavior Checklist in assessing conduct disorder: Issues of reliability and validity. *Research on social work practice*, 8(3), 286–301.



53. Hudziak J. J., Copeland W., Stanger C., & Wadsworth M. (2004). Screening for DSM-IV externalizing disorders with the Child Behavior Checklist: a receiver-operating characteristic analysis. *Journal of child psychology and psychiatry*, 45(7), 1299–1307 <https://doi.org/10.1111/j.1469-7610.2004.00314.x> PMID: 15335349
54. Chang L. Y., Wang M. Y., & Tsai P. S. (2016). Diagnostic accuracy of rating scales for attention-deficit/hyperactivity disorder: a meta-analysis. *Pediatrics*, 137(3). <https://doi.org/10.1542/peds.2015-2749> PMID: 26928969
55. Tsai A. P.-T., Smith R. K., Gonzalez M., Youngstrom E. A., Daughters S. B., Youngstrom J. K., et al. (2022). Diagnostic accuracy of Achenbach scales in detecting youths' substance use disorders. *Psychological Assessment*, 34(6), 570–582. <https://doi-org.udel.idm.oclc.org/10.1037/pas0001115> PMID: 35201823
56. IBM Corp. Released 2021. IBM SPSS Statistics for Windows, Version 28.0. Armonk, NY: IBM Corp.
57. Albert D., & Steinberg L. (2011). Judgment and Decision Making in Adolescence. *Journal of Research on Adolescence*, 21(1), 211–224. <https://doi.org/10.1111/j.1532-7795.2010.00724.x>
58. Defoe I. N., Dubas J. S., Figner B., & van Aken M. A. G. (2015). A meta-analysis on age differences in risky decision making: Adolescents versus children and adults. *Psychological Bulletin*, 141(1), 48–84. <https://doi.org/10.1037/a0038088> PMID: 25365761
59. Cohen J. (1988). Statistical power analysis for the behavioral sciences. *Lawrence Erlbaum Associates*.
60. Owens M. M., Potter A., Hyatt C. S., Albaugh M., Thompson W. K., Jernigan T., et al. (2021). Recalibrating expectations about effect size: A multi-method survey of effect sizes in the ABCD study. *PLOS ONE*, 16(9), e0257535. <https://doi.org/10.1371/journal.pone.0257535> PMID: 34555056
61. Conley M. I., Hernandez J., Salvati J. M., Gee D. G., & Baskin-Sommers A. (2022). The role of perceived threats on mental health, social, and neurocognitive youth outcomes: A multicontextual, person-centered approach. *Development and Psychopathology*, 1–22. <https://doi.org/10.1017/S095457942100184X> PMID: 35232507
62. DeJoseph M. L., Herzberg M. P., Sifre R. D., Berry D., & Thomas K. M. (2022). Measurement matters: An individual differences examination of family socioeconomic factors, latent dimensions of children's experiences, and resting state functional brain connectivity in the ABCD sample. *Developmental Cognitive Neuroscience*, 53, 101043. <https://doi.org/10.1016/j.dcn.2021.101043> PMID: 34915436
63. Schettini E., Wilson S., & Beauchaine T. P. (2021). Internalizing-externalizing comorbidity and regional brain volumes in the ABCD study. *Development and Psychopathology*, 33(5), 1620–1633. <https://doi.org/10.1017/s0954579421000560> PMID: 36238203
64. Insel T., Cuthbert B., Garvey M., Heinssen R., Pine D. S., Quinn K., et al. (2010). Research domain criteria (RDoC): Toward a new classification framework for research on mental disorders. *The American Journal of Psychiatry*, 167(7), 748–751. <https://doi.org/10.1176/appi.ajp.2010.09091379> PMID: 20595427
65. Reynolds B., Karraker K., Horn K., & Richards J. B. (2003). Delay and probability discounting as related to different stages of adolescent smoking and non-smoking. *Behavioural Processes*, 64(3), 333–344. [https://doi.org/10.1016/s0376-6357\(03\)00168-2](https://doi.org/10.1016/s0376-6357(03)00168-2) PMID: 14580702
66. Hao X., Talati A., Shankman S. A., Liu J., Kaiser J., Tenke C. E., et al. (2017). Stability of Cortical Thinning in Persons at Increased Familial Risk for Major Depressive Disorder Across 8 Years. *Biological Psychiatry. Cognitive Neuroscience and Neuroimaging*, 2(7), 619–625. <https://doi.org/10.1016/j.bpsc.2017.04.009> PMID: 29085917
67. Feaster D. J., Mikulich-Gilbertson S., & Brincks A. M. (2011). Modeling site effects in the design and analysis of multisite trials. *The American Journal of Drug and Alcohol Abuse*, 37(5), 383–391. <https://doi.org/10.3109/00952990.2011.600386> PMID: 21854281
68. Samanez-Larkin G. R., & Knutson B. (2015). Decision making in the ageing brain: changes in affective and motivational circuits. *Nature Reviews Neuroscience*, 16(5), 278–289. <https://doi.org/10.1038/nrn3917> PMID: 25873038
69. Kotov R., Cicero D. C., Conway C. C., DeYoung C. G., Dombrovski A., Eaton N. R., et al. (2022). The Hierarchical Taxonomy of Psychopathology (HiTOP) in psychiatric practice and research. *Psychological medicine*, 52(9), 1666–1678. <https://doi.org/10.1017/S0033291722001301> PMID: 35650658
